# Supplementary material for: Global modeling of aerosol nucleation with an explicit chemical mechanism for highly oxygenated organic molecules (HOMs)
Source: Copernicus journal article supplement (doi:10.5194/egusphere-2024-401), 2024-02-13
Supplement: Supplementary file 1 [file egusphere-2024-401-supplement.pdf]

## Global Modeling Organics-related New Particle Formation and its Contribution to Global Aerosol Number Concentrations using CAM6-Chem

### Text S1. Ion Concentrations in CAM6-Chem

Ions are introduced to the model to simulate ion-induced NPF (Dunne et al., 2016). Specifically, we consider atmospheric ions generated by galactic cosmic rays. The ion concentrations, denoted as  $[n_{\pm}]$ , are computed following the equation outlined by Franchin et al. (2015):

$$[n_{\pm}] = \frac{(k_i^2 + 4\alpha q)^{0.5} - k_i}{2\alpha} \quad (S1)$$

and  $q$  ( $\text{cm}^{-3} \text{ s}^{-1}$ ) represents the ion-pair production rate by galactic cosmic rays (download from: <https://svn-ccsm-inputdata.cgd.ucar.edu/trunk/inputdata/atm/waccm/gcrs/>).  $\alpha$  is the ion-ion recombination coefficient ( $\text{cm}^3 \text{ s}^{-1}$ ) calculated by (Franchin et al., 2015):

$$\alpha = 6 \times 10^{-8} \left(\frac{300}{T}\right)^{0.5} + 6 \times 10^{-26} [M_{air}] \left(\frac{300}{T}\right)^4 \quad (S2)$$

$[M_{air}]$  is the concentration of air molecules ( $\text{cm}^{-3}$ ). The ion loss rate  $k_i$ , is due to the ion condensation sink (CS) onto aerosols and the ion-induced nucleation:

$$k_i = CS + \frac{J_{org,i}}{2[n_{\pm}]} \quad (S3)$$

### Text S2. COC Saturated Concentration in CAM6-Chem

Condensable organic compounds (COC) condense onto newly formed aerosols in accordance with their saturation vapor concentration, denoted as  $(C_{COC}^*)$ . This concentration is computed using the ideal gas law equation:

$$C_{COC}^* = \frac{MW \times \zeta \times P(T)}{R T} \quad (S4)$$

where  $MW$  is the molecular weight of the COC and  $\zeta$  is the activity coefficient of COC and assumed equal to 1.  $P(T)$  is the saturation vapor pressure at temperature  $T$ ,  $R$  is the ideal gas constant. The saturation vapor pressure at temperature  $T$  can be calculated following Chung and Seinfeld (2002):

$$P(T) = P(T_0) \cdot e^{\left[\frac{-\Delta H_{vap}}{R} \left(\frac{1}{T} - \frac{1}{T_0}\right)\right]} \quad (S5)$$

34

where  $P(T_0)$  is the saturation vapor pressure at temperature  $T_0 = 298$  K and  $\Delta H_{vap}$  is the enthalpies of vaporization which represent the energy to transform the liquid substance into gas-phase (values shown in Table 1).

36

### 38 Text S3. Threshold Value of NPF Event Happening

40 To determine the threshold to initiate an NPF event (i.e., the threshold of  $j_{20nm}$  in model), we collect smallest nucleation rates (at size between 5nm to 30nm) measurements in Kerminen et al. (2018). Following Kerminen et al. (2018), there are total 58 sites showing smallest nucleation rates with different backgrounds, including boreal forest, China, mountainous regions, polars, rural remote and urban regions (<https://iopscience.iop.org/article/10.1088/1748-9326/aadf3c/data>). Distribution of frequency of the smallest nucleation rates that instrument can detect from different stations are shown in Figure S1.

46 When  $j_{20nm} >$  threshold, we can compare simulated nucleation / growth rate during NPF events (Table S1), condensation sink and NPF frequency (Table S2) with measurements, even in stations where thresholds are not detectable. We chose 10th percentile ( $j_{20nm} = 0.054 \text{ cm}^{-3} \text{ s}^{-1}$ ), median value ( $j_{20nm} = 0.4 \text{ cm}^{-3} \text{ s}^{-1}$ ) and 90th percentile ( $j_{20nm} = 2.43 \text{ cm}^{-3} \text{ s}^{-1}$ ) of all smallest nucleation rates (Figure S1) as the threshold individually. This helps us to quantify uncertainty in above-mentioned simulated parameters (shown in Table S1 and S2).

50

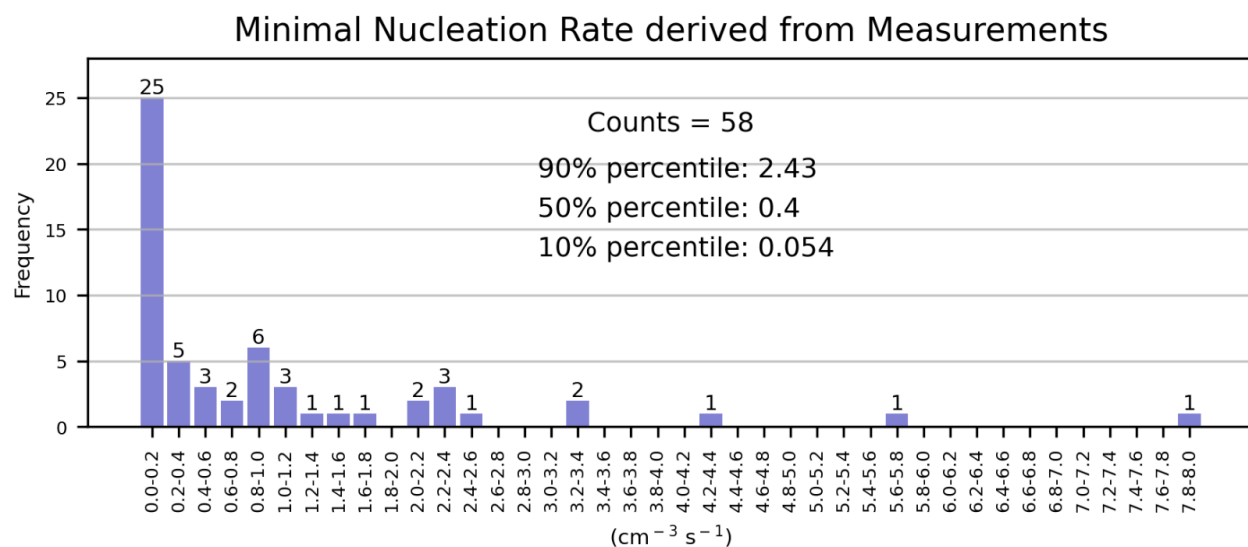

52

Figure S1. Frequency of smallest nucleation rate could 'start' NPF events. All the smallest nucleation rate values derived from Kerminen et al. (2018). Counts and different percentiles of all the collected nucleation rates are texted in figure.

54

56

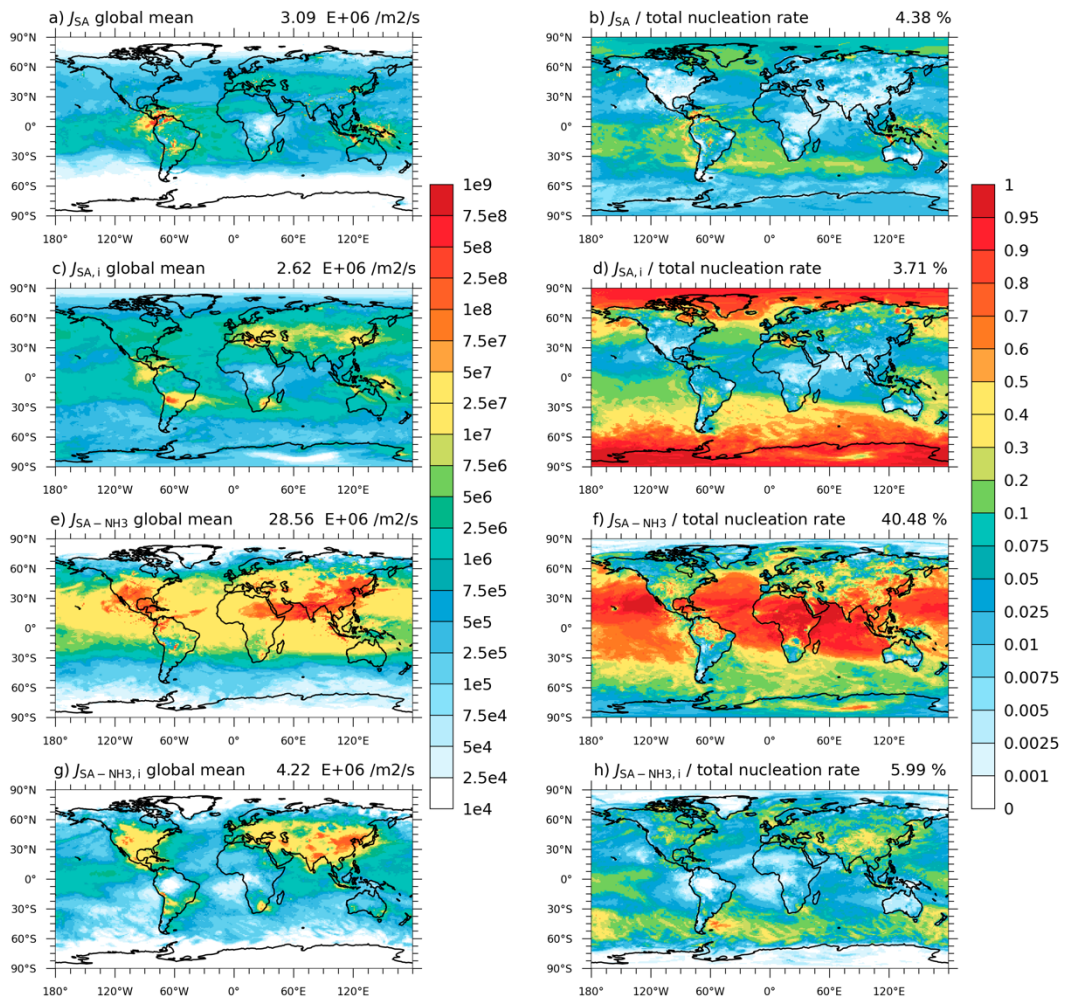

58 Figure S2. The 2013 annual average vertically integrated organic nucleation rate in the troposphere (a, c, e, g) and their contribution (b, d, f, h)  
 60 for binary neutral nucleation (a, b), binary ion-induced nucleation (c, d), ternary neutral nucleation (e, f), and ternary ion-induced nucleation (g, f) for the Inorg\_Org case. The strings at the upper right indicate the global mean value.

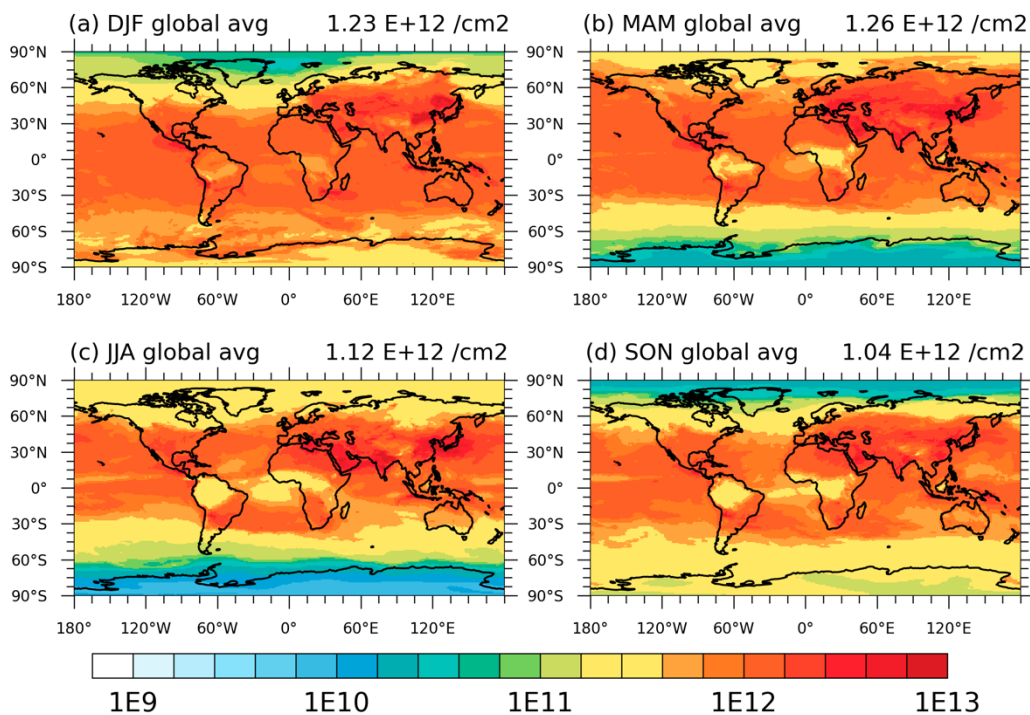

62

64 Figure S3. The 2013 annual average vertically integrated  $\text{H}_2\text{SO}_4$  concentration for (a) DJF, (b) MAM, (c) JJA, and (d) SON in the Inorg\_Org (Units:  $\text{cm}^{-2}$ ). The strings at the upper right indicate the global mean value.

66

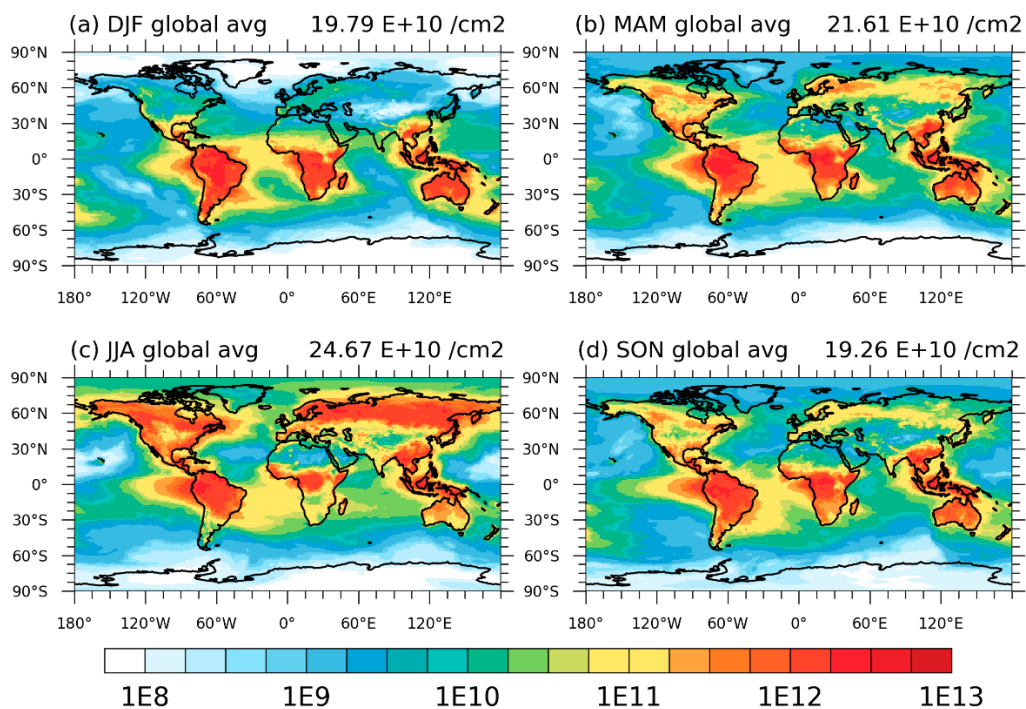

68

70 Figure S4. The 2013 annual average vertically integrated HOMs concentration for (a) DJF, (b) MAM, (c) JJA, and (d) SON in the Inorg\_Org (Units:  $\text{cm}^{-2}$ ). The strings at the upper right indicate the global mean value.

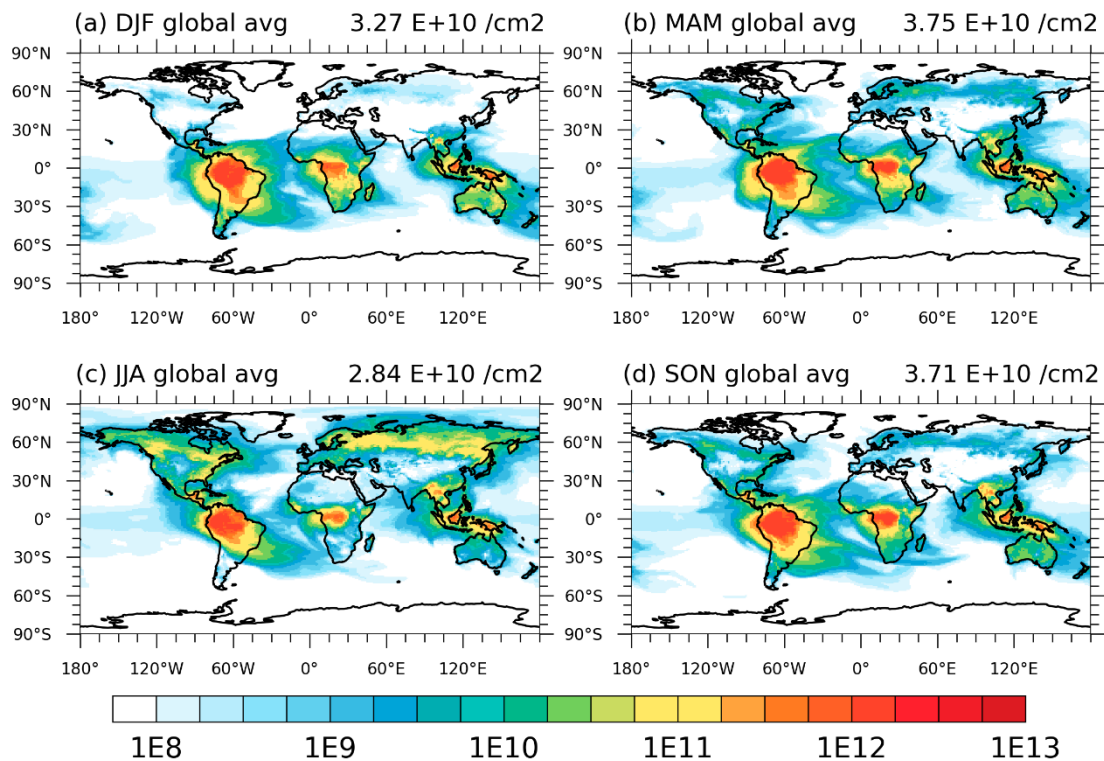

72

Figure S5. The 2013 annual average vertically integrated ACC concentration for (a) DJF, (b) MAM, (c) JJA, and (d) SON in the Inorg\_Org (Units: cm<sup>-2</sup>). The strings at the upper right indicate the global mean value.

74

76

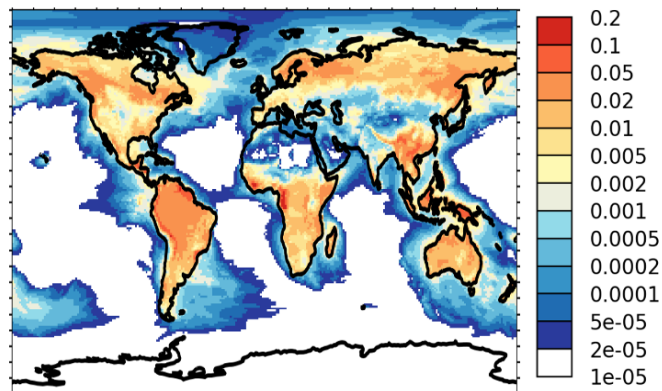

78

Figure S6. Annually averaged concentrations of HOMs at the top of boundary layer concentrations in this study in 2013 (scaled by 1/10) (Units: pptv).

80

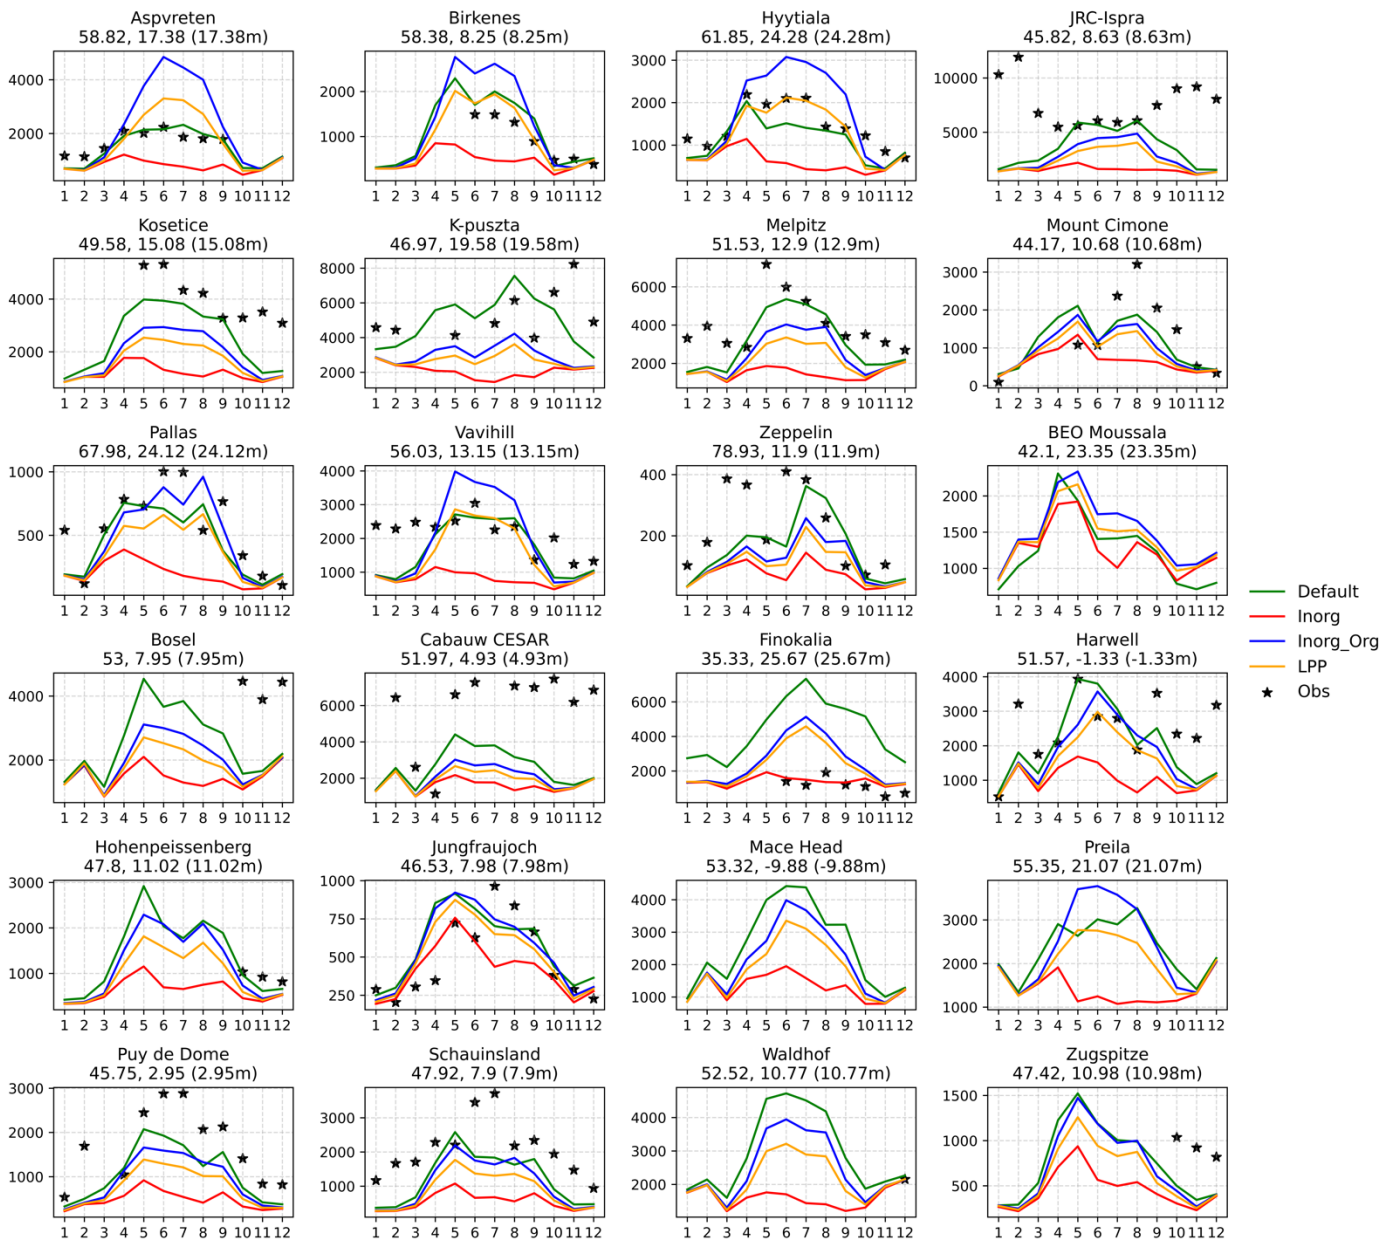

82

84

86

Figure S7. Seasonal cycle of N30 in 2008 at EUARCCI measurement sites (Units:  $\text{cm}^{-3}$ ). The subtitle indicates site locations. Solid stars represent measured monthly mean concentrations. Numbers in X-axis show the month. Model experiments are detailed in Table 2. The red line depicts the default CESM2.1 model (Default), the yellow line indicates the model with an updated inorganic nucleation scheme (Inorg), blue lines represent the model incorporating organic nucleation based on Inorg (Inorg\_Org), and orange lines are similar to blue lines but utilize a lower mass yield for nucleating organics (LPP).

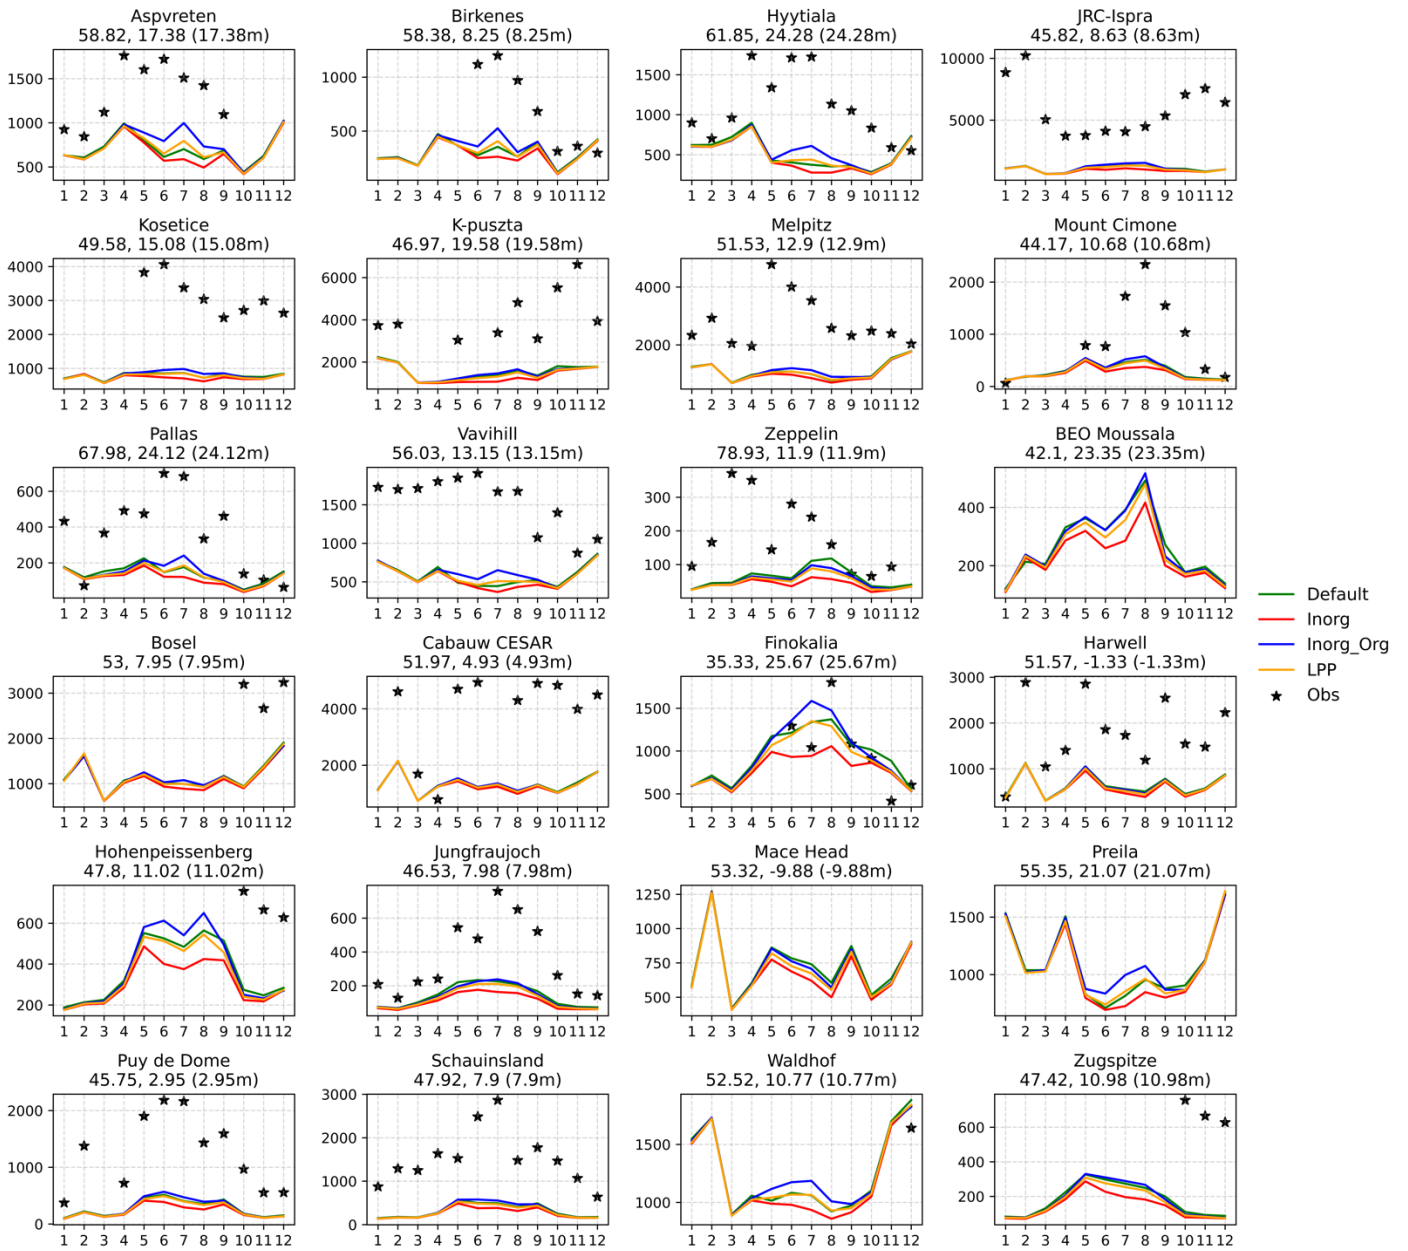

88

90

Figure S8. Same as Figure S6, but for N50 (unit:  $\text{cm}^{-3}$ )

Table S1. Results of model simulations conducted at 13 different sites, based on the experimental configurations outlined in Table 2.

| Date            | Station <sup>c</sup> | Location                   | Type        | Nucleation Rate (J) (/cm <sup>3</sup> /s) |                        |                    | Size for J (nm) | Growth Rate (GR) (nm/h) |                        |                    | Size range for GR (nm) |
|-----------------|----------------------|----------------------------|-------------|-------------------------------------------|------------------------|--------------------|-----------------|-------------------------|------------------------|--------------------|------------------------|
|                 |                      |                            |             | Obs <sup>a</sup>                          | Inorg_Org <sup>b</sup> | Inorg <sup>b</sup> |                 | Obs <sup>a</sup>        | Inorg_Org <sup>b</sup> | Inorg <sup>b</sup> |                        |
| 03-04/2007      | Hyytiälä, Finland    | 61.51° N, 24.17° E (181m)  | Boreal      | 1.08±1.05                                 | 2.4 ~ 4.3 (2.6)        | 0.3 ~ / (0.8)      | [3, 40]         | 2.76±0.9                | 7.4~11.9 (8.1)         | 3.0~/ (3.8)        | [3, 40]                |
| 08-10/2012      | Ozark Forest, US     | 38.74° N, 92.20° W (3.7m)  | Forest      | 11±10.6                                   | 5.3 ~ 10.8 (6.1)       | 0.4 ~ / (0.9)      | 1               | 4.7±2.6                 | 5.6~6.8 (6.0)          | 5.9 ~ / (5.4)      | [5, 25]                |
| 06/2012         | Po Valley, Italy     | 44.39° N, 11.37° E (11m)   | Rural       | 6.8 (2.7~38.5)                            | 3.0 ~ 4.2 (3.1)        | /                  | [2.7, 38.5]     | 7.2 (3.8~13.8)          | 10.7~14.3 (11.1)       | /                  | [7, 20]                |
| 03-06/2014      | Leicester, UK        | 52° 37' N, 1° 07' W        | Urban       | 1.335                                     | 2.7 ~4.5 (3.0)         | 0.3 ~ / (0.8)      | [10, 25]        | 1.3±0.4                 | 6.2~7.8 (6.5)          | 8.2~/ (9.8)        | [10, 25]               |
| 08/2007         | Toronto, Canada      | 43° 42' N, 79° 32' W       | Semi-urban  | 12.9                                      | 8.2 ~ 14.4 (9.2)       | 0.2 ~ / (0.9)      | [5.6, 30]       | 6.3±1.6                 | 8.6~9.5 (9.0)          | 13.7 ~ / (12.6)    | [5.6, 30]              |
| 04-07/2012      | Gadanki, India       | 13.46° N, 79.17° E (375m)  | Semi-urban  | 1.2±2.3                                   | 1.2 ~ / (1.6)          | /                  | [5, 25]         | 4.1±2                   | 5.5~/ (5.8)            | /                  | [5, 25]                |
| 09-11/2015      | Nanjing, China       | 32.30° N, 118.72° E        | Urban       | 7±3.89                                    | 1.6 ~ / (2.5)          | /                  | [5,10]          | 6.2±2.6                 | 10.5~/ (12.1)          | /                  | [10, 20]               |
| 06-07/2014      | Wangdu, China        | 38.67° N, 115.21° E        | Rural       | 24.6±22.8                                 | 3.2 ~ 7.5 (4.1)        | /                  | [3, 25]         | 7.3±3.3                 | 9.7~13.1 (10.7)        | /                  | [3, 25]                |
| 07/2008         | Beijing, China       | 39.56° N, 116.19° E (35 m) | Urban       | No Obs                                    | 5.9 ~ / (7.0)          | 0.1 ~ / (/)        | 1.7             | 6.9±2.7                 | 12.9~11.2 (13.9)       | 29.7~/ (/)         | [12, 550]              |
| 01-03/2012      | Nanjing, China       | 32.12° N, 118.95° E        | Urban       | 23.9 (2.6-56.8)                           | 0.5 ~ / (/)            | 0.4 ~ / (/)        | 2               | 5.9 (6.1-10.9)          | 5.3~/ (/)              | 4.8~/ (/)          | [3, 7]                 |
| 04-05/2010      | Qingdao, China       | 36° 09' N, 120° 29' E      | Urban/Coast | 13.8±14.8                                 | 4.4 ~ 11.0 (5.6)       | 0.1 ~ / (/)        | [5.6, 30]       | 6.4±2.2                 | 11.2 ~ 11.4 (11.4)     | 10.5~/ (/)         | Over the growth period |
| 10-11/2010      | Hongkong, China      | 22.41° N, 114.12° E (640m) | Suburban    | 2.95±2.1                                  | 0.3 ~ / (/)            | 0.3 ~ / (/)        | [5.5, 10]       | 3.9±1.9                 | 14.4 ~ / (/)           | 14.2~/ (/)         | [5.5, 25]              |
| 12/2010-01/2011 | Hongkong, China      | 22.3° N, 114.18° E (40m)   | Urban       | 1.9±0.6                                   | /                      | /                  | [5.5, 10]       | 5.2±1.6                 | /                      | /                  | [5.5, 10]              |

<sup>a</sup>Obs represents mean value from observation from measurements

<sup>b</sup>The model result is presented as a range for each site: the lower limit of the range is mean value of nucleation/growth rate during NPF event when choosing the 10th percentile of all smallest nucleation rates as the threshold ( $j_{20nm} = 0.054 \text{ cm}^{-3} \text{ s}^{-1}$ ) of NPF event happening, while the upper limit is based on the 90th percentile. Values in brackets represent results obtained using the median as the threshold value. A forward slash (/) indicates that no NPF events were detected in the simulation.

<sup>c</sup>Measurements in Hyytiälä are from Pierce et al. (2011). Measurements in Ozark forest are from Yu et al. (2014). Measurements in Po Valley are from Kontkanen et al. (2016). Measurements in Leicester are from Hama et al. (2017). Measurements in Toronto are from Meng et al. (2015). Measurements in Gadanki are from Kanawade et al. (2014). Measurements in Nanjing (2015) are from Dai et al. (2017). Measurements in Wangdu are from Wu et al. (2017). Measurements in Beijing are from Zhang et al. (2011). Measurements in Nanjing (2012) are from Herrmann et al. (2014). Measurements in Qingdao are from Zhu et al. (2014). Measurements in Hongkong (2010) are from Guo et al. (2014). Measurements in Hongkong (2010-2011) are from Wang et al. (2015).



**Table S2.** Comparison between measured and modeling NPF frequency and condensation sink during NPF events. Model experiments are described in Table 2.

| Date            | Station <sup>d</sup>        | Location                    | Type                  | NPF Frequency (%) |            |           | Condensation Sink (s-1) |               |           |
|-----------------|-----------------------------|-----------------------------|-----------------------|-------------------|------------|-----------|-------------------------|---------------|-----------|
|                 |                             |                             |                       | Obs               | Inorg_Org  | Inorg     | Obs                     | Inorg_Org     | Inorg     |
| 04-05/2007      | Pallas, Finland             | 67° 58' N, 24° 07' E (560m) | Boreal forest         | 20                | 0          | 0         | 0.63                    | No event      | No event  |
| 04-05/2007      | Hyytiälä, Finland           | 61° 50' N, 24° 18' E (180m) | Rural, boreal forest  | 48                | 36~54 (49) | 0~15 (0)  | 1.4                     | 2.3 ± 1.1     | No event  |
| 04-05/2007      | Vavihill, Sweden            | 56° 01' N, 13° 09' E (172m) | Rural                 | 57                | 41~61 (57) | 0~13 (0)  | 3.4                     | 3.2 ± 1.2     | 1.9 ± 1.3 |
| 04-05/2007      | Mace Head, Ireland          | 53° 19' N, 09° 53' W (5m)   | Atlantic, bare land   | /                 | 13~43 (39) | 0~5 (0)   | 0.64                    | 4.8 ± 1.4     | 1.6 ± 0.1 |
| 04-05/2007      | Cabauw, Netherlands         | 51° 57' N, 04° 53' E (0m)   | Ocean/urban           | 65                | 5~20 (18)  | 0~8 (0)   | 2.9                     | 2.2 ± 0.8     | 1.0 ± 0.2 |
| 04-05/2007      | Melpitz, Germany            | 51° 32' N, 12° 54' E (87m)  | Rural polluted        | 44                | 11~52 (49) | 0~30 (0)  | 8.4                     | 5.3 ± 1.5     | 3.0 ± 0.8 |
| 04-05/2007      | Hohenpeissenber, Germany    | 47° 48' N, 11° 00' E (980m) | High-elevation forest | 46                | 0~2 (0)    | 0~5 (0)   | 4.1                     | No event      | No event  |
| 04-05/2007      | K-Puszt, Hungary            | 46° 58' N, 19° 35' E (125m) | Deciduous forest      | 83                | 16~79 (72) | 0~40 (15) | 6.6                     | 5.6 ± 2.4     | 3.6 ± 1.6 |
| 04-05/2007      | San Pietro Capofiume, Italy | 44° 37' N, 11° 40' E (11m)  | Suburban              | 36                | 60~97 (89) | 0~23 (2)  | 4.4                     | 4.1 ± 1.4     | 1.2 ± 0.3 |
| 04-05/2007      | Finokalia, Greece           | 35° 20' N, 25° 40' E (250m) | Coastal               | 15                | 0~2 (0)    | 0         | 4.2                     | 5.9 ± 0.1     | No event  |
| 03-06/2014      | Leicester, UK               | 52° 37' N, 1° 07' W (375m)  | Urban                 | 22                | 38~57 (56) | 0~39 (10) | 4.8 ± 1.8               | 2.9 ± 1.0     | 1.1 ± 0.4 |
| 04-07/2012      | Gadanki, India              | 13.46° N, 79.17° E          | Semi-urban            | 6                 | 0~26 (22)  | 0         | 7.1 ± 4.6               | 4.2 ± 0.5     | 1.8 ± 3.3 |
| 09-11/2015      | Nanjing, China              | 32.30° N, 118.72° E         | Urban                 | 22                | 0~4 (3)    | 0         | 40 ± 25 *               | 14.9 ± 16.5 ° | No event  |
| 06-07/2014      | WangDu, China               | 38.67° N, 115.21° E         | Rural                 | 54                | 38~92 (88) | 0         | No observation          |               |           |
| 04-05/2010      | QingDao, China              | 36° 09' N, 120° 29' E       | Urban/Coast           | 41                | 1~10 (10)  | 0~5 (0)   | 30.5 ± 12               | 7.6 ± 2       | No event  |
| 10-11/2010      | HongKong, China             | 22.40° N, 114.12° E (640m)  | Suburban              | 23                | 0          | 0         | 50~190                  | 3.4 ± 10.2    | No event  |
| 12/2010-01/2011 | HongKong, China             | 22.3° N, 114.18° E (40m)    | Urban                 | 20                | 0          | 0         | 0.63                    | No event      | No event  |

<sup>a</sup>Obs represents mean value from observation from measurements

<sup>b</sup>The lower limit of the result from model simulation is derived when choosing the 10th percentile of all smallest nucleation rates as the threshold of NPF event happening, while the upper limit is based on the 90th percentile. Values in brackets represent results obtained using the median as the threshold value.

<sup>c</sup>The condensation sink (CS) is calculated for the entire duration of both the simulation and the measurement period, not solely during new particle formation (NPF) events.

<sup>d</sup>Measurements in Pallas, Hyytiälä, Vavihill, Mace Head, Cabauw, Melpitz, Hohenpeissenber, K-Puszt, San Pietro Capofiume and Finokalia are from Manninen et al. (2010). Others are the same as Table S1.

104

106

108

110

112

Table S3. Comparison of sulfur budget across different studies.

|                                               |                                             | This study (CESM-MAM4) |         |           | Liu et al. (2012) |           | Spracklen et al. (2005) | Mann et al. (2010) |
|-----------------------------------------------|---------------------------------------------|------------------------|---------|-----------|-------------------|-----------|-------------------------|--------------------|
|                                               |                                             | Default                | Inorg   | Inorg_Org | CESM-MAM3         | CESM-MAM7 | GLOMAP-bin              | GLOMAP-mode        |
| Gas Burden (Tg S)                             | SO <sub>2</sub>                             | 0.29                   | 0.29    | 0.29      | 0.35              | 0.34      | 0.49                    | 0.3 (0.2-0.68)     |
|                                               | DMS                                         | 0.068                  | 0.067   | 0.067     | 0.067             | 0.067     | 0.04                    | 0.027 (0.02-0.15)  |
|                                               | H <sub>2</sub> SO <sub>4</sub>              | 0.0006                 | 0.00059 | 0.00054   | 0.0004            | 0.00042   |                         | 0.0001             |
| Gas Sink (Tg S/yr)                            | SO <sub>2</sub> deposition                  | 27.76                  | 27.76   | 27.78     | 19.7              | 19        |                         |                    |
|                                               | H <sub>2</sub> SO <sub>4</sub> aqueous      | 0.48                   | 0.49    | 0.48      | 0.59              | 0.51      |                         |                    |
|                                               | H <sub>2</sub> SO <sub>4</sub> condensation | 11.61                  | 12.018  | 11.89     | 13.9              | 13.7      | 13                      |                    |
|                                               | H <sub>2</sub> SO <sub>4</sub> deposition   | 0.0079                 | 0.023   | 0.016     | 0.002             | 0.003     | 0.01                    |                    |
|                                               | H <sub>2</sub> SO <sub>4</sub> nucleation   | 0.37                   | 0.11    | 0.17      | 0.03              | 0.03      | 0.07                    |                    |
| Gas Source                                    | H <sub>2</sub> SO <sub>4</sub> production   | 12.57                  | 12.77   | 12.66     | 14.5              | 14.3      |                         |                    |
| H <sub>2</sub> SO <sub>4</sub> lifetime (min) |                                             | 24.87                  | 24.3    | 22.44     | 14.5              | 15.3      |                         |                    |

Table S4. Comparison of H<sub>2</sub>SO<sub>4</sub> concentration with measurements

| Measurement site            | Measurement time | Coordinates                                      | [H <sub>2</sub> SO <sub>4</sub> ] 10 <sup>6</sup> molec cm <sup>-3</sup> (>10 <sup>4</sup> ) |            |             |            |
|-----------------------------|------------------|--------------------------------------------------|----------------------------------------------------------------------------------------------|------------|-------------|------------|
|                             |                  |                                                  | Mean                                                                                         |            | Median      |            |
|                             |                  |                                                  | Measurement                                                                                  | Simulation | Measurement | Simulation |
| Hyytiälä, Finland           | 24.3.–28.6.2007  | 61° 51' N, 24° 17' E, 181 m a.s.l.               | 0.43                                                                                         | 2.61       | 0.18        | 0.3        |
| San Pietro Capofiume, Italy | 21.6.–16.7.2009  | 44° 39' N, 11° 37' E, 11 m a.s.l.                | 5.40                                                                                         | 4.57       | 2.40        | 2.79       |
| Melpitz, Germany            | 30.4.–31.5.2008  | 51° 32' N, 12° 54' E, 87 m a.s.l.                | 6.43                                                                                         | 10.53      | 2.94        | 2.8        |
| Niwot Ridge, Colorado USA   | 24.6.–15.7.2007  | 40° 62' N, 105° 50' W, 3022 m a.s.l.             | 1.83                                                                                         | 2.52       | 1.40        | 1.36       |
| Atlanta, Georgia USA        | 30.7.–31.8.2002  | 33° 74' N, 84° 38' W, 275 m a.s.l.               | 12.90                                                                                        | 9.95       | 2.85        | 1.03       |
| Beijing, China              | 1.6–31.8.2008    | four-layer building in THU 40° 94' N, 116° 33' E | 2.51                                                                                         | 17.91      | 1.81        | 3.15       |

130 **References**

- 132 Chung, S. H. and Seinfeld, J. H.: Global distribution and climate forcing of carbonaceous aerosols, *J. Geophys. Res.-*  
*Atmos.*, 107, 10.1029/2001jd001397, 2002.
- 134 Dai, L., Wang, H., Zhou, L., An, J., Tang, L., Lu, C., Yan, W., Liu, R., Kong, S., Chen, M., Lee, S., and Yu, H.:  
Regional and local new particle formation events observed in the Yangtze River Delta region, China, *J. Geophys.*  
136 *Res.-Atmos.*, 122, 2389-2402, 10.1002/2016jd026030, 2017.
- 138 Franchin, A., Ehrhart, S., Leppä, J., Nieminen, T., Gagné, S., Schobesberger, S., Wimmer, D., Duplissy, J.,  
Riccobono, F., Dunne, E. M., Rondo, L., Downard, A., Bianchi, F., Kupc, A., Tsagkogeorgas, G., Lehtipalo, K.,  
Manninen, H. E., Almeida, J., Amorim, A., Wagner, P. E., Hansel, A., Kirkby, J., Kürten, A., Donahue, N. M.,  
140 Makhmutov, V., Mathot, S., Metzger, A., Petäjä, T., Schnitzhofer, R., Sipilä, M., Stozhkov, Y., Tomé, A.,  
Kerminen, V. M., Carslaw, K., Curtius, J., Baltensperger, U., and Kulmala, M.: Experimental investigation of ion-  
142 ion recombination under atmospheric conditions, *Atmos. Chem. Phys.*, 15, 7203-7216, 10.5194/acp-15-7203-2015,  
2015.
- 144 Guo, S., Hu, M., Zamora, M. L., Peng, J. F., Shang, D. J., Zheng, J., Du, Z. F., Wu, Z., Shao, M., Zeng, L. M.,  
Molina, M. J., and Zhang, R. Y.: Elucidating severe urban haze formation in China, *P. Natl. Acad. Sci. USA.*, 111,  
146 17373-17378, 10.1073/pnas.1419604111, 2014.
- 148 Hama, S. M. L., Ma, N., Cordell, R. L., Kos, G. P. A., Wiedensohler, A., and Monks, P. S.: Lung deposited surface  
area in Leicester urban background site/UK: Sources and contribution of new particle formation, *Atmos. Environ.*,  
151, 94-107, <https://doi.org/10.1016/j.atmosenv.2016.12.002>, 2017.
- 150 Herrmann, E., Ding, A. J., Kerminen, V. M., Petäjä, T., Yang, X. Q., Sun, J. N., Qi, X. M., Manninen, H., Hakala,  
J., Nieminen, T., Aalto, P. P., Kulmala, M., and Fu, C. B.: Aerosols and nucleation in eastern China: first insights  
152 from the new SORPES-NJU station, *Atmos. Chem. Phys.*, 14, 2169-2183, 10.5194/acp-14-2169-2014, 2014.
- 154 Kanawade, V. P., Tripathi, S. N., Siingh, D., Gautam, A. S., Srivastava, A. K., Kamra, A. K., Soni, V. K., and Sethi,  
V.: Observations of new particle formation at two distinct Indian subcontinental urban locations, *Atmos. Environ.*,  
96, 370-379, <https://doi.org/10.1016/j.atmosenv.2014.08.001>, 2014.
- 156 Kontkanen, J., Järvinen, E., Manninen, H. E., Lehtipalo, K., Kangasluoma, J., Decesari, S., Gobbi, G. P., Laaksonen,  
A., Petäjä, T., and Kulmala, M.: High concentrations of sub-3nm clusters and frequent new particle formation  
158 observed in the Po Valley, Italy, during the PEGASOS 2012 campaign, *Atmos. Chem. Phys.*, 16, 1919-1935,  
10.5194/acp-16-1919-2016, 2016.
- 160 Liu, X., Easter, R. C., Ghan, S. J., Zaveri, R., Rasch, P., Shi, X., Lamarque, J. F., Gettelman, A., Morrison, H., Vitt,  
F., Conley, A., Park, S., Neale, R., Hannay, C., Ekman, A. M. L., Hess, P., Mahowald, N., Collins, W., Iacono, M.  
162 J., Bretherton, C. S., Flanner, M. G., and Mitchell, D.: Toward a minimal representation of aerosols in climate  
models: description and evaluation in the Community Atmosphere Model CAM5, *Geosci. Model Dev.*, 5, 709-739,  
164 10.5194/gmd-5-709-2012, 2012.
- 166 Mann, G. W., Carslaw, K. S., Spracklen, D. V., Ridley, D. A., Manktelow, P. T., Chipperfield, M. P., Pickering, S.  
J., and Johnson, C. E.: Description and evaluation of GLOMAP-mode: a modal global aerosol microphysics model  
for the UKCA composition-climate model, *Geosci. Model Dev.*, 3, 519-551, 10.5194/gmd-3-519-2010, 2010.
- 168 Manninen, H. E., Nieminen, T., Asmi, E., Gagné, S., Häkkinen, S., Lehtipalo, K., Aalto, P., Vana, M., Mirme, A.,  
Mirme, S., Hörrak, U., Plass-Dülmer, C., Stange, G., Kiss, G., Hoffer, A., Törö, N., Moerman, M., Henzing, B., de  
170 Leeuw, G., Brinkenberg, M., Kouvarakis, G. N., Bougiatioti, A., Mihalopoulos, N., O'Dowd, C., Ceburnis, D.,  
Arneth, A., Svenningsson, B., Swietlicki, E., Tarozzi, L., Decesari, S., Facchini, M. C., Birmili, W., Sonntag, A.,  
172 Wiedensohler, A., Boulon, J., Sellegri, K., Laj, P., Gysel, M., Bukowiecki, N., Weingartner, E., Wehrle, G.,  
Laaksonen, A., Hamed, A., Joutsensaari, J., Petäjä, T., Kerminen, V. M., and Kulmala, M.: EUCAARI ion  
174 spectrometer measurements at 12 European sites – analysis of new particle formation events, *Atmos. Chem. Phys.*,  
10, 7907-7927, 10.5194/acp-10-7907-2010, 2010.
- 176 Meng, H., Zhu, Y., Evans, G. J., Jeong, C.-H., and Yao, X.: Roles of SO<sub>2</sub> oxidation in new particle formation  
events, *J. Environ. Sci.*, 30, 90-101, <https://doi.org/10.1016/j.jes.2014.12.002>, 2015.
- 178 Pierce, J. R., Riipinen, I., Kulmala, M., Ehn, M., Petäjä, T., Junninen, H., Worsnop, D. R., and Donahue, N. M.:  
Quantification of the volatility of secondary organic compounds in ultrafine particles during nucleation events,  
180 *Atmos. Chem. Phys.*, 11, 9019-9036, 10.5194/acp-11-9019-2011, 2011.
- 182 Spracklen, D. V., Pringle, K. J., Carslaw, K. S., Chipperfield, M. P., and Mann, G. W.: A global off-line model of  
size-resolved aerosol microphysics: I. Model development and prediction of aerosol properties, *Atmos. Chem.*  
*Phys.*, 5, 2227-2252, 10.5194/acp-5-2227-2005, 2005.

184 Wang, Z. B., Hu, M., Pei, X. Y., Zhang, R. Y., Paasonen, P., Zheng, J., Yue, D. L., Wu, Z. J., Boy, M., and  
186 Wiedensohler, A.: Connection of organics to atmospheric new particle formation and growth at an urban site of  
188 Beijing, *Atmos. Environ.*, 103, 7-17, 10.1016/j.atmosenv.2014.11.069, 2015.  
190 Wu, Z. J., Ma, N., Groß, J., Kecorius, S., Lu, K. D., Shang, D. J., Wang, Y., Wu, Y. S., Zeng, L. M., Hu, M.,  
192 Wiedensohler, A., and Zhang, Y. H.: Thermodynamic properties of nanoparticles during new particle formation  
194 events in the atmosphere of North China Plain, *Atmos. Res.*, 188, 55-63,  
196 <https://doi.org/10.1016/j.atmosres.2017.01.007>, 2017.  
198 Yu, H., Ortega, J., Smith, J. N., Guenther, A. B., Kanawade, V. P., You, Y., Liu, Y., Hosman, K., Karl, T., Seco, R.,  
200 Geron, C., Pallardy, S. G., Gu, L., Mikkilä, J., and Lee, S.-H.: New Particle Formation and Growth in an Isoprene-  
Dominated Ozark Forest: From Sub-5 nm to CCN-Active Sizes, *Aerosol Sci. Technol.*, 48, 1285-1298,  
10.1080/02786826.2014.984801, 2014.  
Zhang, Y. M., Zhang, X. Y., Sun, J. Y., Lin, W. L., Gong, S. L., Shen, X. J., and Yang, S.: Characterization of new  
particle and secondary aerosol formation during summertime in Beijing, China, *Tellus B.*, 63, 382-394,  
10.1111/j.1600-0889.2011.00533.x, 2011.  
Zhu, Y., Sabaliauskas, K., Liu, X., Meng, H., Gao, H., Jeong, C.-H., Evans, G. J., and Yao, X.: Comparative  
analysis of new particle formation events in less and severely polluted urban atmosphere, *Atmos. Environ.*, 98, 655-  
664, <https://doi.org/10.1016/j.atmosenv.2014.09.043>, 2014.
